# Supplementary material for: Genetic mapping for agronomic traits in a MAGIC population of common bean (Phaseolus vulgaris L.) under drought conditions
Source: PubMed Central journal article supplement (PMC7670608; doi:10.1186/s12864-020-07213-6), 2020-11-16
Supplement: 12864_2020_7213_MOESM1_ESM.pdf [file 12864_2020_7213_MOESM1_ESM.pdf]

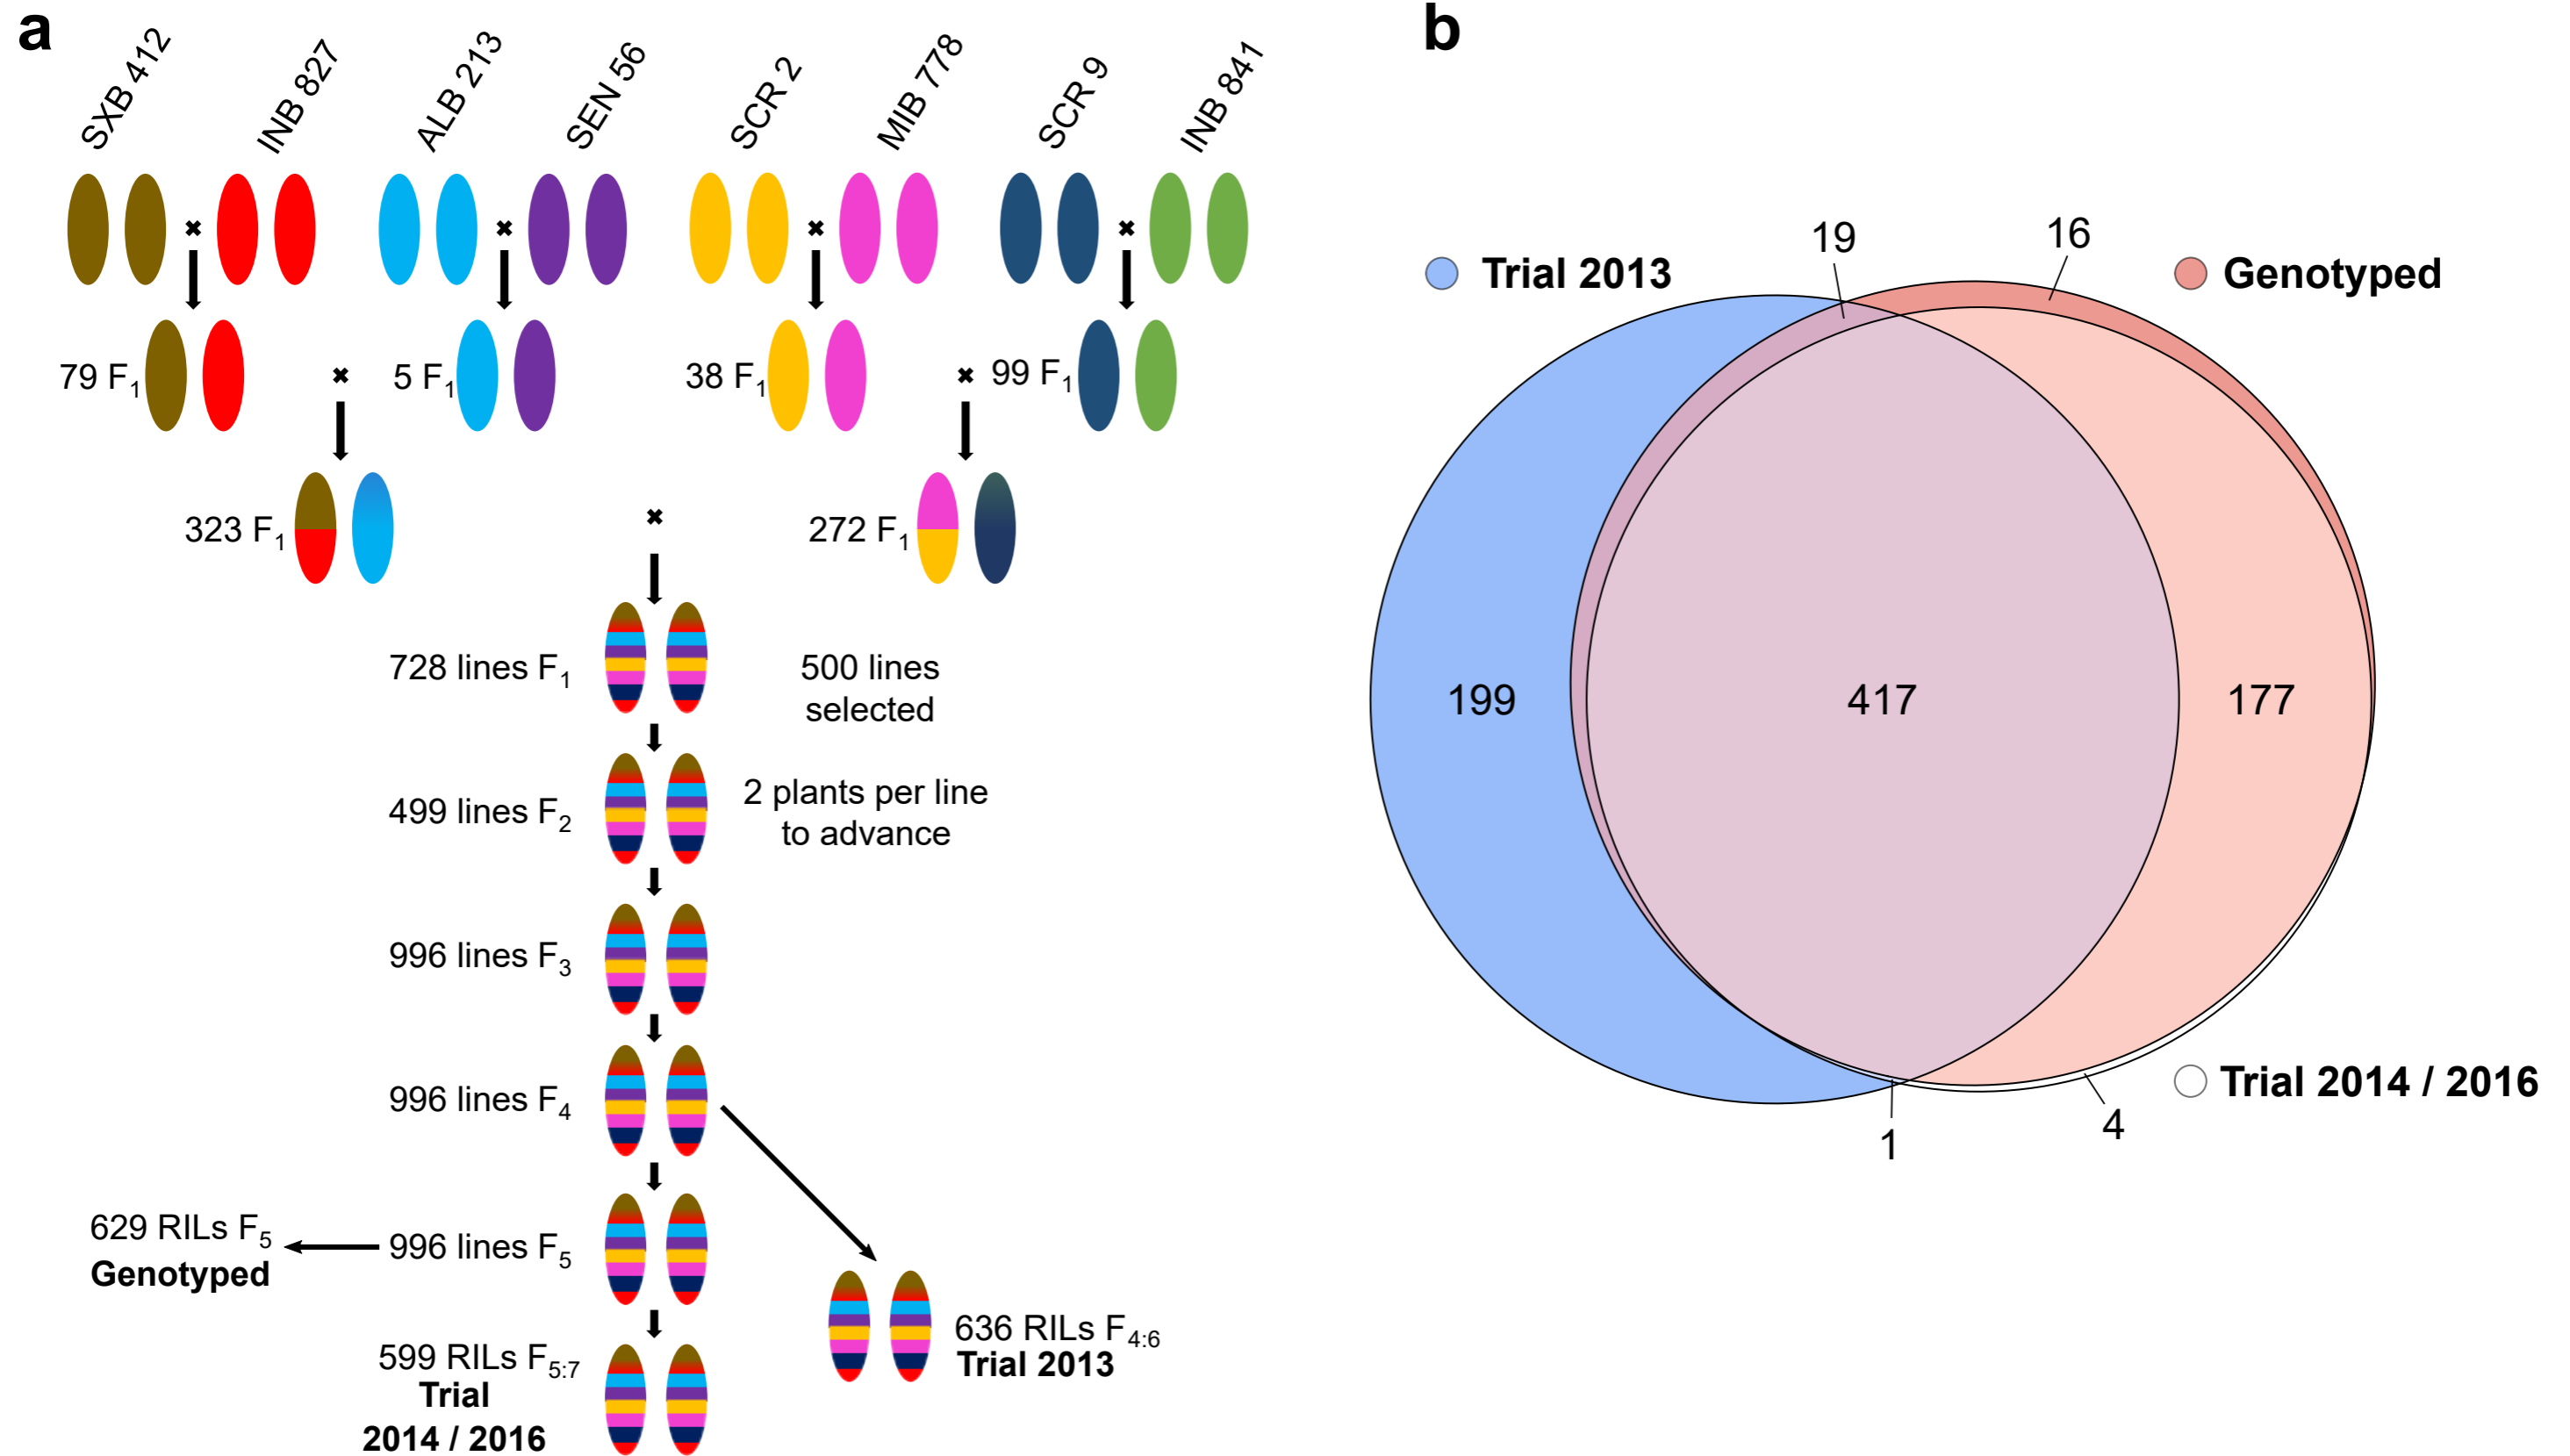

**Additional file 1. a.** Crossing and selection scheme of the common bean MAGIC population.

**b.** Venn diagram showing number of RILs used for genotyping and phenotyping in each trial.
