# Supplementary material for: Genetic mapping for agronomic traits in a MAGIC population of common bean (Phaseolus vulgaris L.) under drought conditions
Source: PubMed Central journal article supplement (PMC7670608; doi:10.1186/s12864-020-07213-6), 2020-11-16
Supplement: 12864_2020_7213_MOESM2_ESM.pdf [file 12864_2020_7213_MOESM2_ESM.pdf]

2013

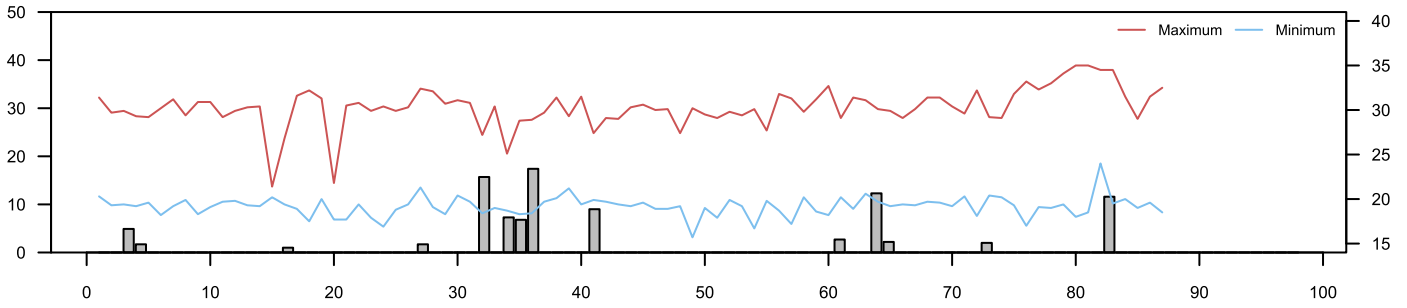

2014

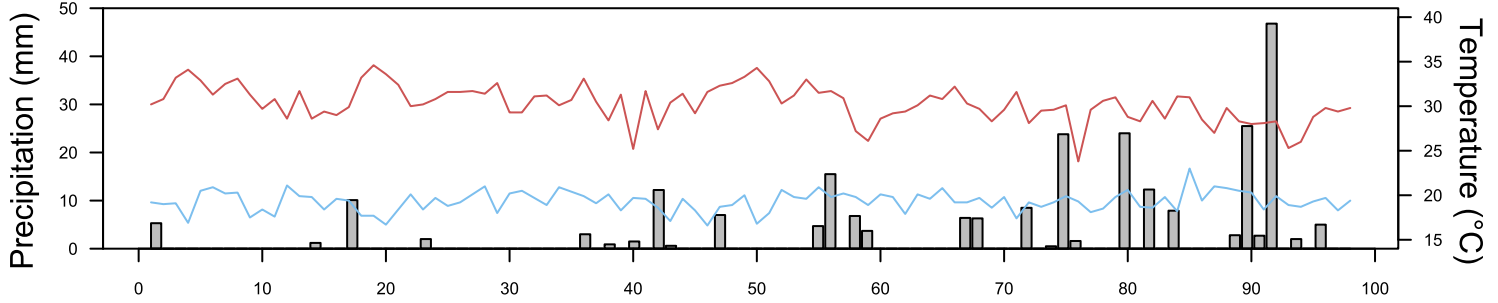

2016

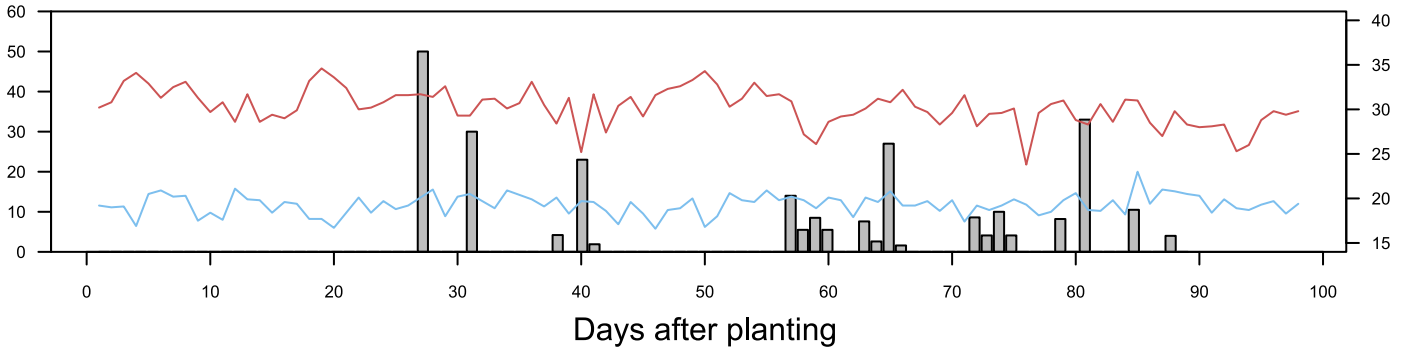

**Additional file 2.** Precipitation, maximum and minimum temperatures during trials at Palmira, Colombia.
