# Supplementary material for: Genetic mapping for agronomic traits in a MAGIC population of common bean (Phaseolus vulgaris L.) under drought conditions
Source: PubMed Central journal article supplement (PMC7670608; doi:10.1186/s12864-020-07213-6), 2020-11-16
Supplement: 12864_2020_7213_MOESM9_ESM.pdf [file 12864_2020_7213_MOESM9_ESM.pdf]

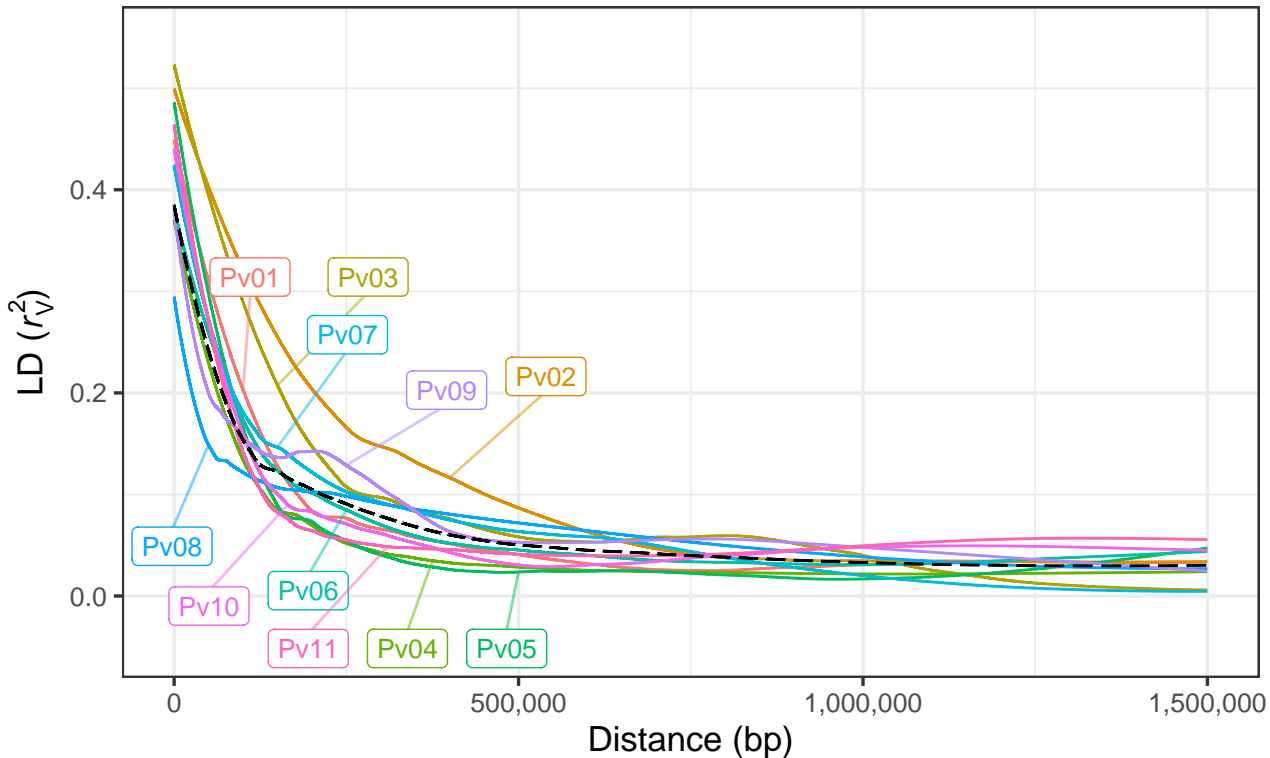

**Additional file 9.** Pattern of linkage disequilibrium (LD) decay calculated genome-wide (black-dashed line) and for each chromosome separately (colored lines) in a MAGIC population of common bean. The pairwise measures of LD were calculated in sliding windows of 100 markers and corrected for kinship relationships in the population ( $r_v^2$ ). Each line corresponds to a locally estimated scatterplot smoothing (LOESS) regression on the LD measures.
