# Supplementary material for: Genetic mapping for agronomic traits in a MAGIC population of common bean (Phaseolus vulgaris L.) under drought conditions
Source: PubMed Central journal article supplement (PMC7670608; doi:10.1186/s12864-020-07213-6), 2020-11-16
Supplement: 12864_2020_7213_MOESM14_ESM.pdf [file 12864_2020_7213_MOESM14_ESM.pdf]

# Pv01

0 Mbp 10 Mbp 20 Mbp 30 Mbp 40 Mbp 50 Mbp 60 Mbp

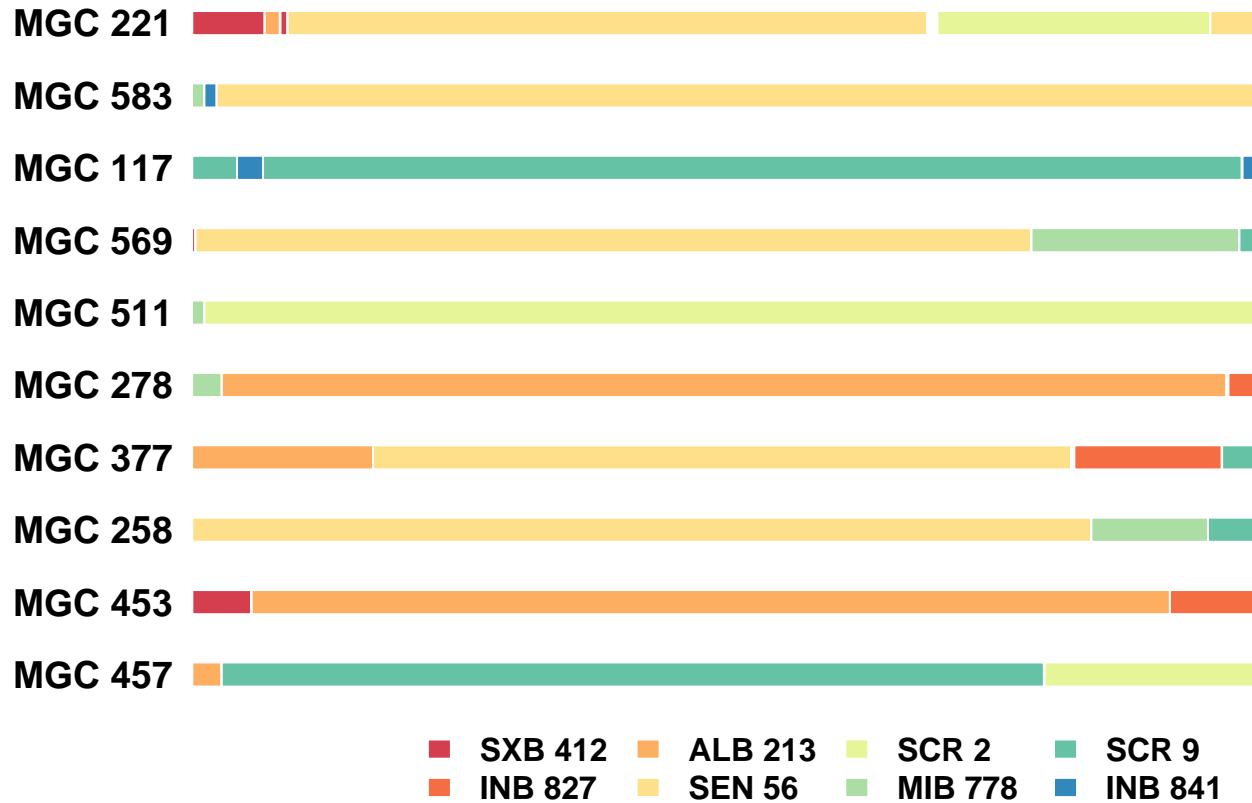

**Additional file 14.** Haplotype composition per chromosome for the top 10 RILs of the common bean MAGIC population.

# Pv02

0 Mbp      10 Mbp      20 Mbp      30 Mbp      40 Mbp      50 Mbp      60 Mbp

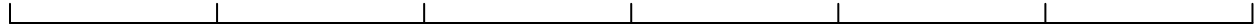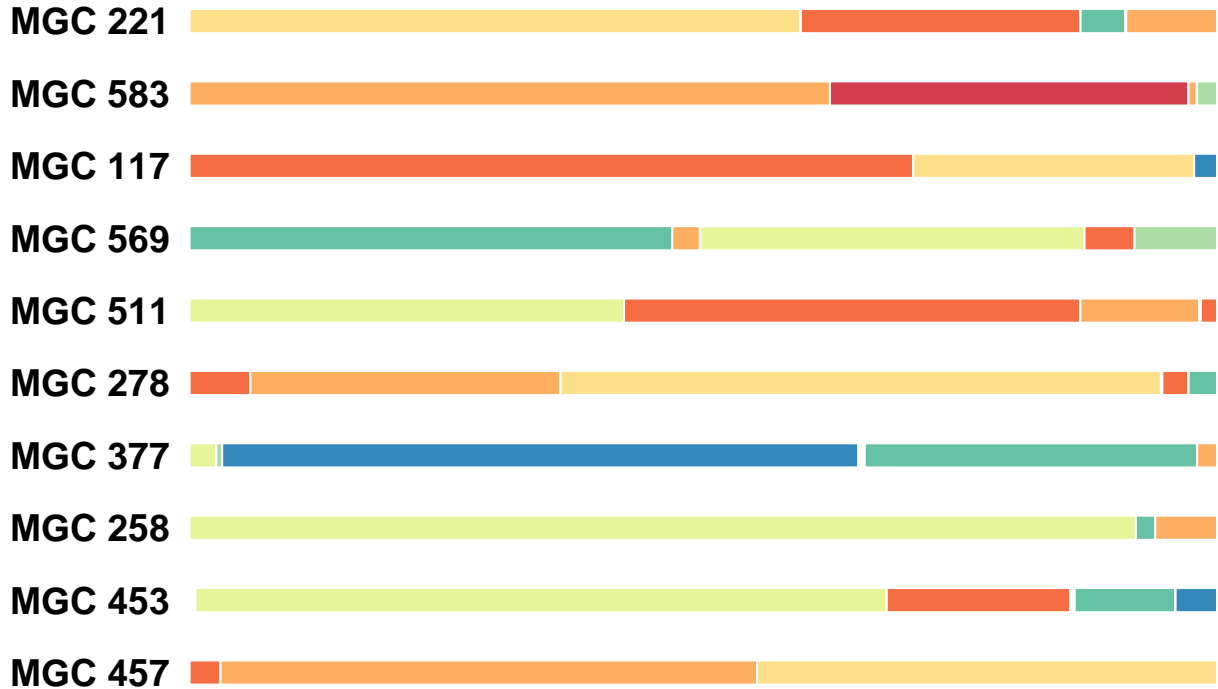

■ SXB 412    ■ ALB 213    ■ SCR 2    ■ SCR 9  
■ INB 827    ■ SEN 56    ■ MIB 778    ■ INB 841

**Additional file 14.** Haplotype composition per chromosome for the top 10 RILs of the common bean MAGIC population.

# Pv03

0 Mbp      10 Mbp      20 Mbp      30 Mbp      40 Mbp      50 Mbp      60 Mbp

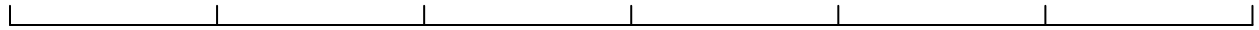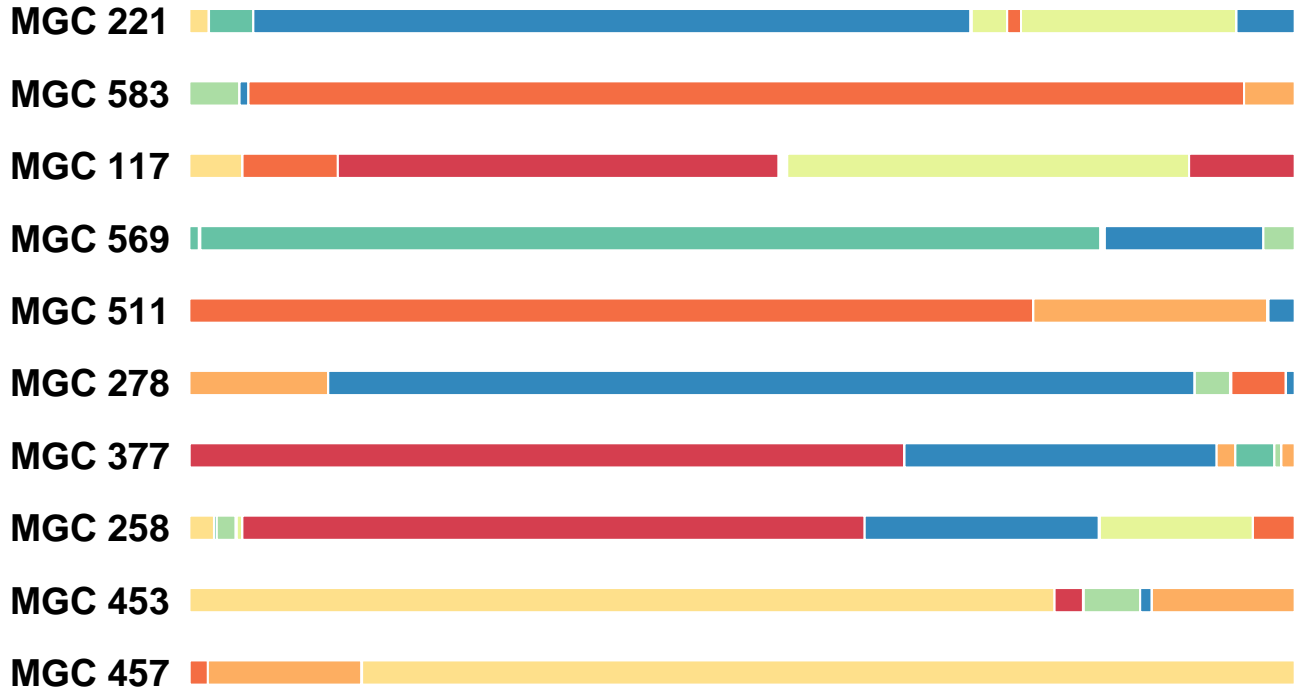

■ SXB 412    ■ ALB 213    ■ SCR 2    ■ SCR 9  
■ INB 827    ■ SEN 56    ■ MIB 778    ■ INB 841

**Additional file 14.** Haplotype composition per chromosome for the top 10 RILs of the common bean MAGIC population.

# Pv04

0 Mbp 10 Mbp 20 Mbp 30 Mbp 40 Mbp 50 Mbp 60 Mbp

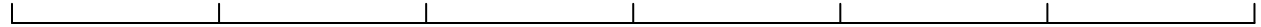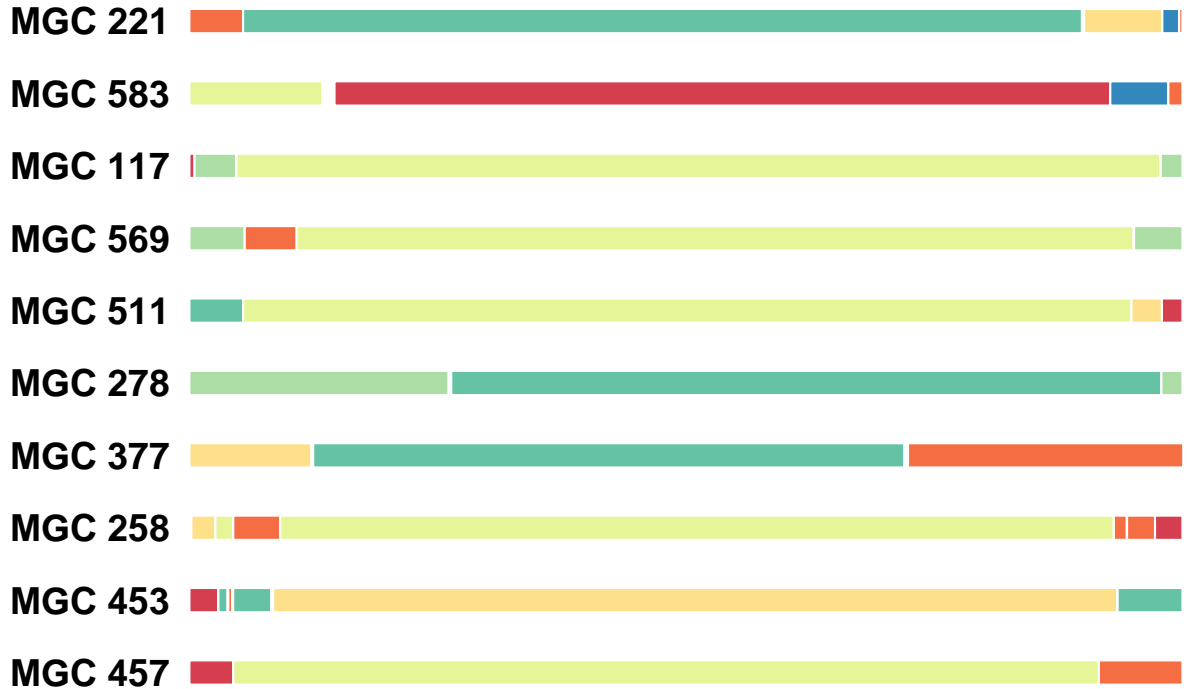

■ SXB 412   ■ ALB 213   ■ SCR 2   ■ SCR 9  
■ INB 827   ■ SEN 56   ■ MIB 778   ■ INB 841

**Additional file 14.** Haplotype composition per chromosome for the top 10 RILs of the common bean MAGIC population.

# Pv05

0 Mbp      10 Mbp      20 Mbp      30 Mbp      40 Mbp      50 Mbp      60 Mbp

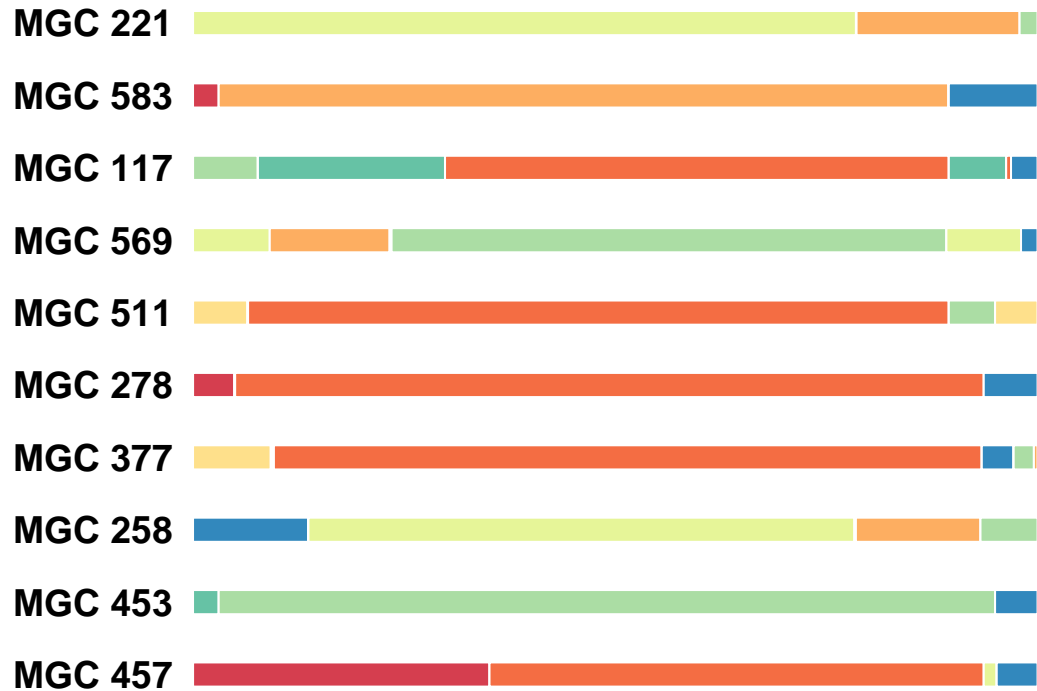

■ SXB 412    ■ ALB 213    ■ SCR 2    ■ SCR 9  
■ INB 827    ■ SEN 56    ■ MIB 778    ■ INB 841

**Additional file 14.** Haplotype composition per chromosome for the top 10 RILs of the common bean MAGIC population.

# Pv06

0 Mbp      10 Mbp      20 Mbp      30 Mbp      40 Mbp      50 Mbp      60 Mbp

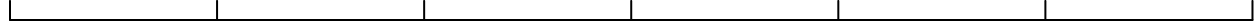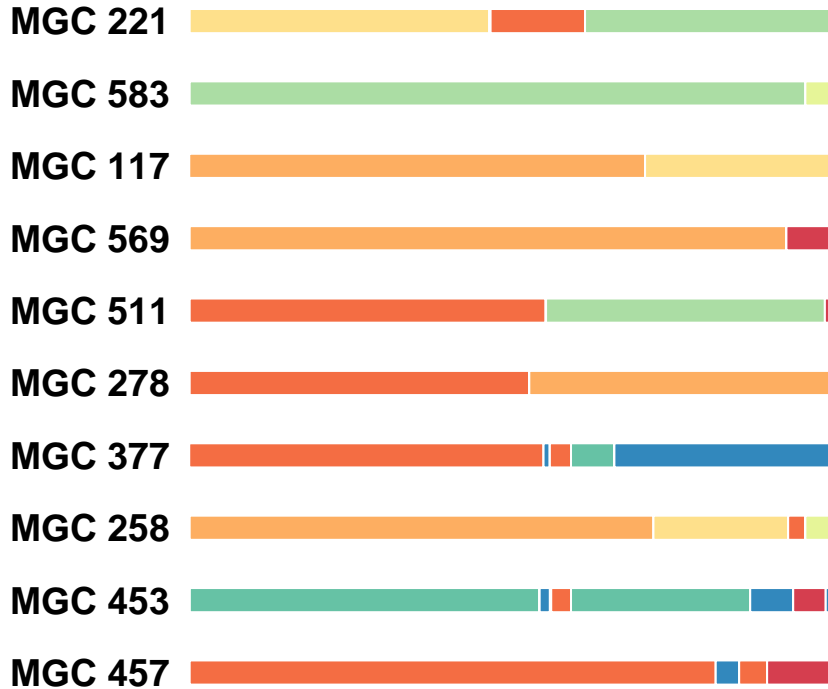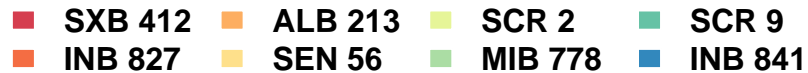

**Additional file 14.** Haplotype composition per chromosome for the top 10 RILs of the common bean MAGIC population.

# Pv07

0 Mbp 10 Mbp 20 Mbp 30 Mbp 40 Mbp 50 Mbp 60 Mbp

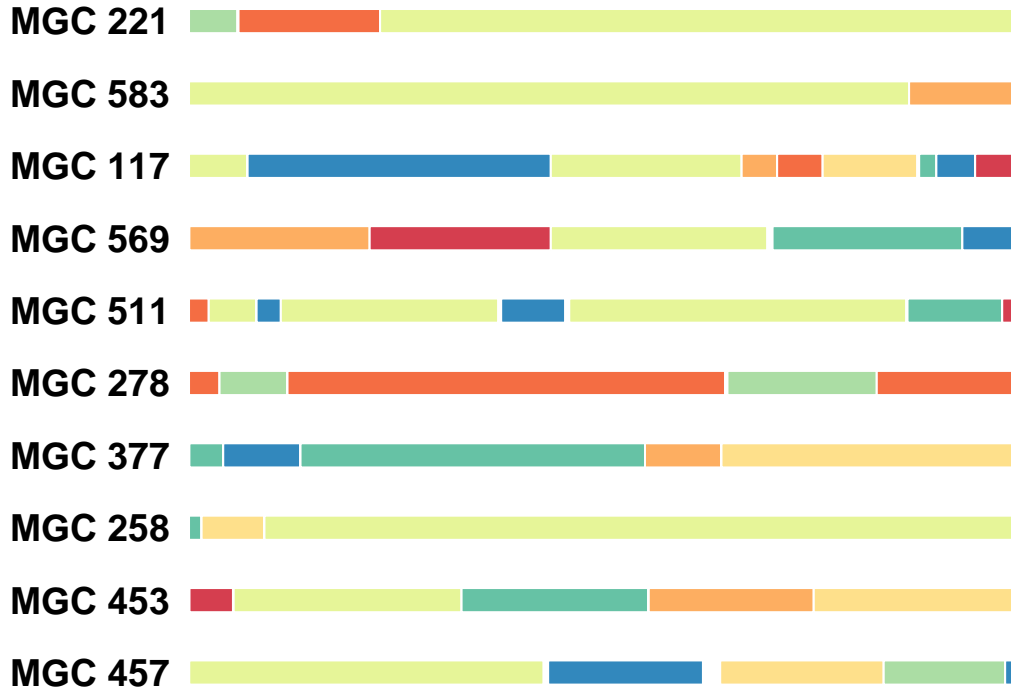

**SXB 412** **ALB 213** **SCR 2** **SCR 9**  
**INB 827** **SEN 56** **MIB 778** **INB 841**

**Additional file 14.** Haplotype composition per chromosome for the top 10 RILs of the common bean MAGIC population.

# Pv08

0 Mbp      10 Mbp      20 Mbp      30 Mbp      40 Mbp      50 Mbp      60 Mbp

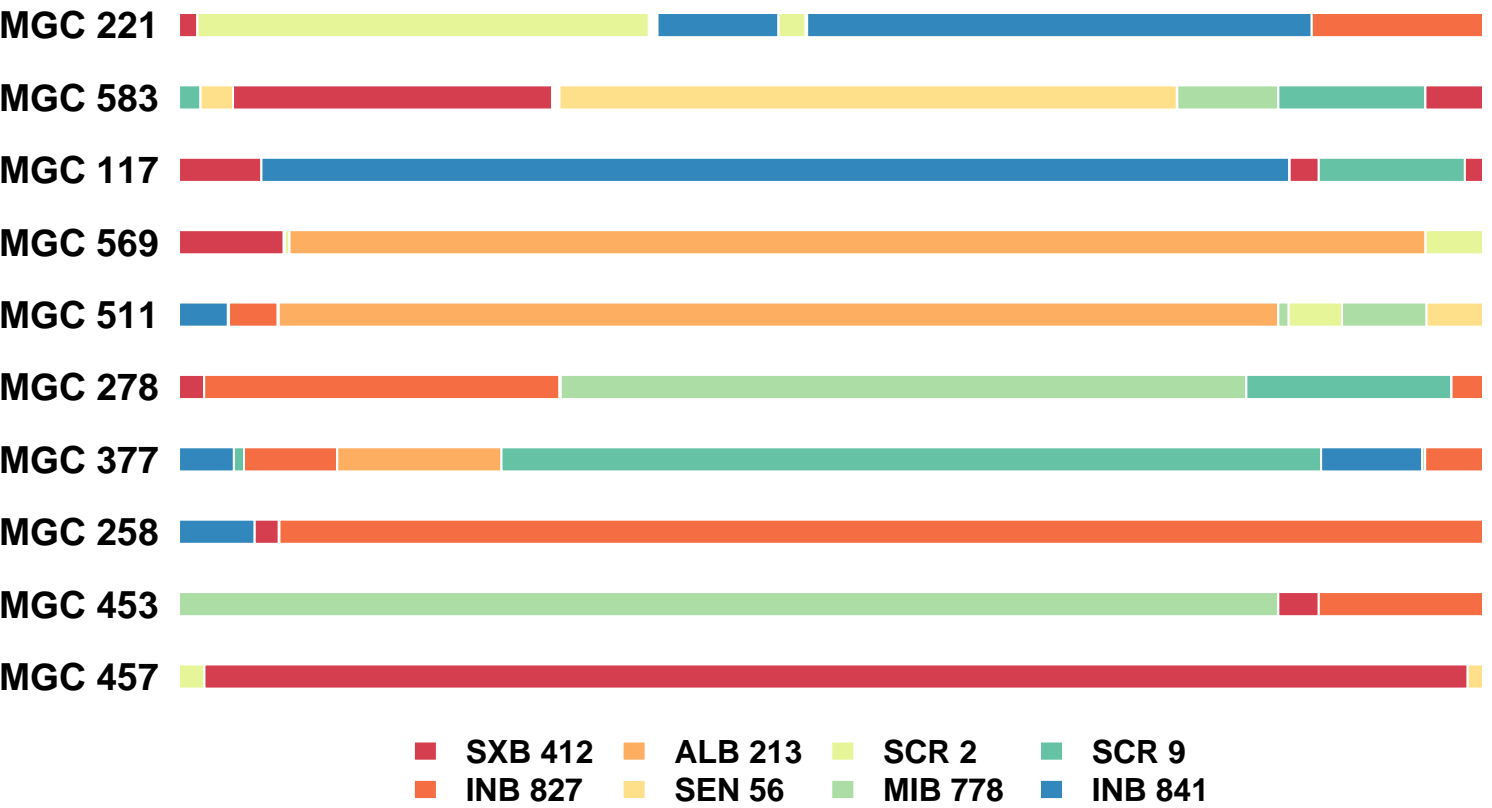

**Additional file 14.** Haplotype composition per chromosome for the top 10 RILs of the common bean MAGIC population.



# Pv09

0 Mbp 10 Mbp 20 Mbp 30 Mbp 40 Mbp 50 Mbp 60 Mbp

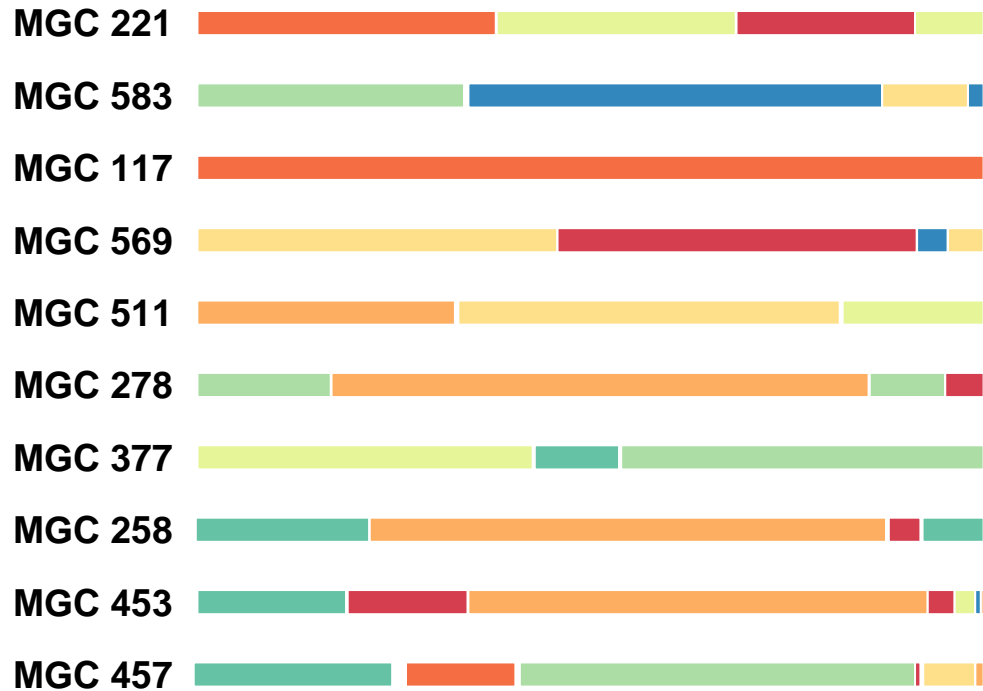

SXB 412 ALB 213 SCR 2 SCR 9  
INB 827 SEN 56 MIB 778 INB 841

**Additional file 14.** Haplotype composition per chromosome for the top 10 RILs of the common bean MAGIC population.

# Pv10

0 Mbp 10 Mbp 20 Mbp 30 Mbp 40 Mbp 50 Mbp 60 Mbp

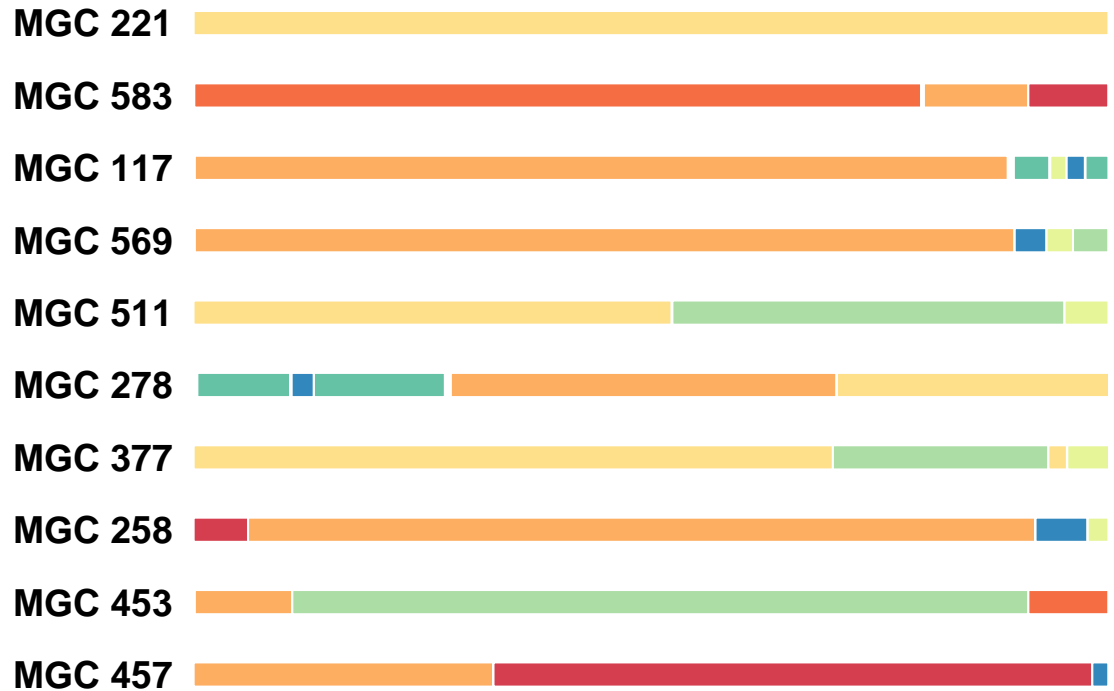

SXB 412 ALB 213 SCR 2 SCR 9  
INB 827 SEN 56 MIB 778 INB 841

**Additional file 14.** Haplotype composition per chromosome for the top 10 RILs of the common bean MAGIC population.

# Pv11

0 Mbp 10 Mbp 20 Mbp 30 Mbp 40 Mbp 50 Mbp 60 Mbp

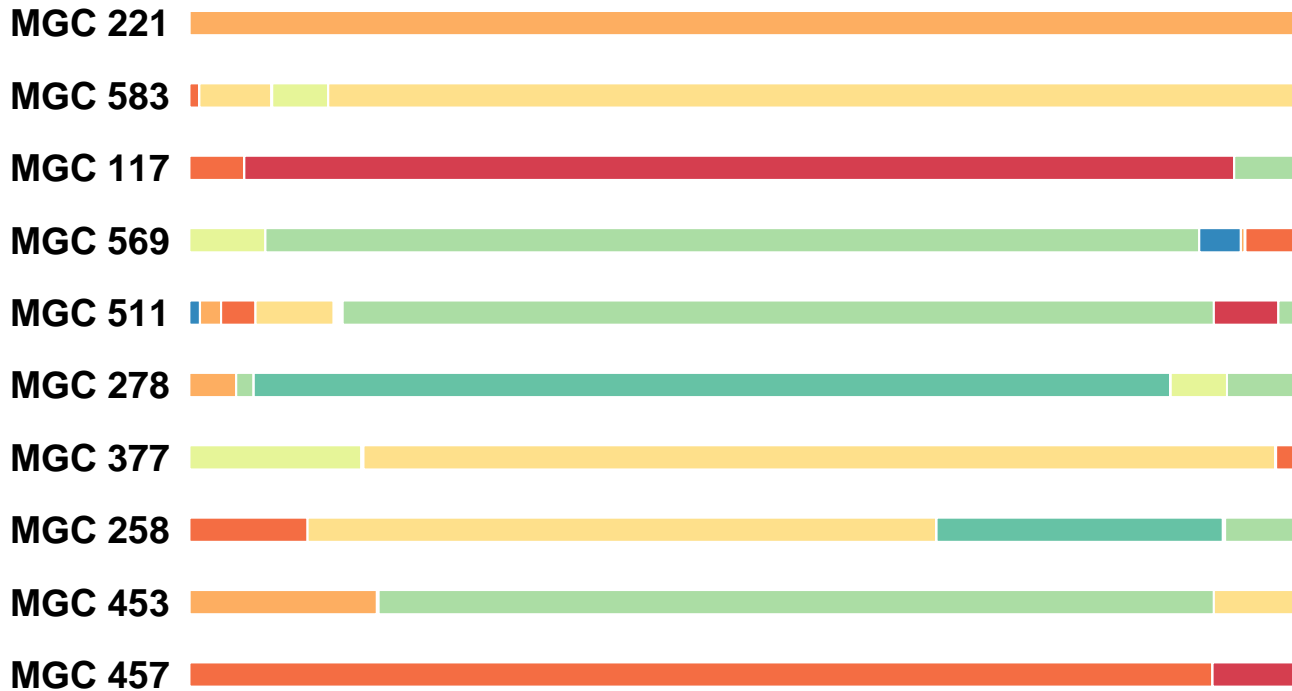

■ SXB 412   ■ ALB 213   ■ SCR 2   ■ SCR 9  
■ INB 827   ■ SEN 56   ■ MIB 778   ■ INB 841

**Additional file 14.** Haplotype composition per chromosome for the top 10 RILs of the common bean MAGIC population.
